# Supplementary material for: Efficient Bioconversion of Stevioside and Rebaudioside A to Glucosylated Steviol Glycosides Using an Alkalihalobacillus oshimesis-Derived Cyclodextrin Glucanotransferase
Source: MDPI journal article supplement (doi:10.3390/molecules28031245), 2023-01-27
Supplement: s1 [file s1]

**Table S1.** MS identification of CGTase.

| Isolate no. | Accession number | Description                                                                    | Coverage | Unique peptides | MW (kDa) | Calc. pI |
|-------------|------------------|--------------------------------------------------------------------------------|----------|-----------------|----------|----------|
| 7           | P31746           | <i>Bacillus</i> sp. (cyclomaltodextrin glucanotransferase)                     | 76.1     | 3               | 78.6     | 4.97     |
| 8           | W7ZLX1           | <i>Bacillus</i> sp. (cyclodextrin glycosyltransferase)                         | 72.12    | 1               | 78.6     | 5.14     |
| 9           | Q5U9W0           | <i>Bacillus</i> sp. (cyclodextrin glycosyltransferase)                         | 59.17    | 1               | 80.6     | 4.94     |
| 10          | F1DPT1           | <i>Bacillus</i> sp. (cyclodextrin glycosyltransferase)                         | 70.42    | 2               | 80.6     | 5.00     |
| 11          | A0A172MLH7       | <i>Bacillus</i> sp. (cyclodextrin glycosyltransferase)                         | 61.49    | 1               | 76.3     | 5.06     |
| 12          | X0RDG2           | <i>Bacillus</i> sp. (cyclodextrin glycosyltransferase)                         | 17.05    | 3               | 78.5     | 4.49     |
| 13          | W7YQ87           | <i>Bacillus</i> sp. (cyclodextrin glycosyltransferase)                         | 15.5     | 6               | 78.4     | 6.44     |
| 14          | A0A1B3B4Y2       | <i>Bacillus</i> sp. (cyclodextrin glycosyltransferase)                         | 1.82     | 1               | 80.1     | 4.42     |
| 15          | P31747           | <i>Bacillus</i> sp. (cyclomaltodextrin glucanotransferase)                     | 2.09     | 1               | 78       | 6.73     |
| 16          | A0A0D0RA67       | <i>Bacillus</i> sp. (cyclodextrin glycosyltransferase)                         | 1.44     | 1               | 79.8     | 6.09     |
| 17          | Q0JW31           | <i>Alkalihalobacillus halodurans</i><br>(cyclomaltodextrin glucanotransferase) | 1.45     | 1               | 75.8     | 6.27     |
| 18          | A0A1S1FMF5       | <i>Bacillus</i> sp. (cyclodextrin glycosyltransferase)                         | 1.55     | 1               | 77.3     | 6.49     |

Accession number: protein number as found for the specific database. Description: protein name as assigned by the database. Coverage: percentage sequence coverage of the protein as detected by MS. Unique peptides: number of unique peptides detected for the specific protein. MW: molecular weight of the protein as given in the database. pI: pI of protein as given in the database.
